# Supplementary material
Source: ML conference proceedings conference paper supplement (https://openreview.net/forum?id=m4rb1Rlfdi)
Supplement: supplementary_material [file attachment]

## A Appendix

This is the appendix for "Semialgebraic Representation of Monotone Deep Equilibrium Models and Applications to Certification".

### A.1 Proof of Lemma 1

**Definition 1 (Clarke's generalized Jacobian) [10]** Let  $f : \mathbb{R}^n \rightarrow \mathbb{R}^m$  be a locally Lipschitz vector-valued function, denote by  $\Omega_f$  any zero measure set such that  $f$  is differentiable outside  $\Omega_f$ . For  $\mathbf{x} \notin \Omega_f$ , denote by  $\mathcal{J}_f(\mathbf{x})$  the Jacobian matrix of  $f$  evaluated at  $\mathbf{x}$ . For any  $\mathbf{x} \in \mathbb{R}^n$ , the generalized Jacobian, or Clarke Jacobian, of  $f$  evaluated at  $\mathbf{x}$ , denoted by  $\mathcal{J}_f^C(\mathbf{x})$ , is defined as the convex hull of all  $m \times n$  matrices obtained as the limit of a sequence of the form  $\mathcal{J}_f(\mathbf{x}_i)$  with  $\mathbf{x}_i \rightarrow \mathbf{x}$  and  $\mathbf{x}_i \notin \Omega_f$ . Symbolically, one has

$$\mathcal{J}_f^C(\mathbf{x}) := \text{conv}\{\lim \mathcal{J}_f(\mathbf{x}_i) : \mathbf{x}_i \rightarrow \mathbf{x}, \mathbf{x}_i \notin \Omega_f\}.$$

In order to estimate the Lipschitz constant  $L_{F,S}^q$ , we need the following lemma:

**Lemma 3** Let  $F : \mathbb{R}^{p_0} \rightarrow \mathbb{R}^K, \mathbf{x} \mapsto \mathbf{Cz}(\mathbf{x})$  be the fully-connected monDEQ. Its Lipschitz constant is upper bounded by the supremum of the operator norm of its generalized Jacobian, i.e., define

$$\bar{L}_{F,S}^q := \sup_{\mathbf{t}, \mathbf{x} \in \mathbb{R}^{p_0}, \mathbf{v}, \mathbf{w} \in \mathbb{R}^K, \mathbf{J} \in \mathcal{J}_z^C(\mathbf{x})} \{\mathbf{t}^T \mathbf{J}^T \mathbf{C}^T \mathbf{v} : \|\mathbf{t}\|_q \leq 1, \mathbf{w}^T \mathbf{v} \leq 1, \|\mathbf{w}\|_q \leq 1, \mathbf{x} \in \mathcal{S}\}, \quad (6)$$

then  $L_{F,S}^q \leq \bar{L}_{F,S}^q$ .

**Proof :** Since  $\mathbf{z}(\mathbf{x}) = \text{ReLU}(\mathbf{Wz}(\mathbf{x}) + \mathbf{Ux} + \mathbf{u})$  by definition of monDEQ,  $\mathbf{z}(\mathbf{x})$  is Lipschitz according to [34, Theorem 1]. Furthermore,  $\mathbf{z}(\mathbf{x})$  is semialgebraic by the semialgebraicity of ReLU in (1). Therefore, the Clarke Jacobian of  $\mathbf{z}$  is conservative. Indeed by [10, Proposition 2.6.2], the Clarke Jacobian is included in the product of subgradients of its coordinates which is a conservative field by [7, Lemma 3, Theorems 2 and 3]. Since  $F = \mathbf{C} \circ \mathbf{z}$ , the mapping  $\mathbf{C}\mathcal{J}_z^C : \mathbf{x} \mapsto \mathbf{C}\mathbf{J}$ , where  $\mathbf{J} \in \mathcal{J}_z^C$ , is conservative for  $F$  by [7, Lemma 5]. So it satisfies an integration formula along segments. Let  $\mathbf{x}_1, \mathbf{x}_2 \in \mathcal{E}$ , and let  $\gamma : [0, 1] \rightarrow \mathbb{R}^{p_0}$  be a parametrization of the segment defined by  $\gamma(t) = \mathbf{x}_1 + t(\mathbf{x}_2 - \mathbf{x}_1)$  (which is absolutely continuous). For almost all  $t \in [0, 1]$ , we have  $\frac{d}{dt} F(\gamma(t)) = \mathbf{C}\mathbf{J}\gamma'(t) = \mathbf{C}\mathbf{J}(\mathbf{x}_2 - \mathbf{x}_1)$  for all  $\mathbf{J} \in \mathcal{J}_z^C(\gamma(t))$ .

Let  $M = \sup_{\mathbf{x} \in \mathcal{S}, \mathbf{J} \in \mathcal{J}_z^C(\mathbf{x})} \|\mathbf{C}\mathbf{J}\|_q$  be the supremum of the operator norm  $\|\mathbf{C}\mathbf{J}\|_q$  for all  $\mathbf{J} \in \mathcal{J}_z^C(\mathbf{x})$  and all  $\mathbf{x} \in \mathcal{S}$ . We prove that  $M < +\infty$ . Indeed,  $\mathbf{z}(\mathbf{x})$  is Lipschitz, hence there exists  $N > 0$  such that  $\|\mathbf{J}\|_q < N$  for all  $\mathbf{J} \in \mathcal{J}_z^C(\mathbf{x})$  and all  $\mathbf{x} \in \mathcal{S}$ . The value  $M$  is thus upper bounded by  $\|\mathbf{C}\|_q N$ .

Therefore, for almost all  $t \in [0, 1]$ ,  $\|\frac{d}{dt} F(\gamma(t))\|_q \leq M \|\mathbf{x}_2 - \mathbf{x}_1\|_q$ , and by integration,

$$\|F(\mathbf{x}_2) - F(\mathbf{x}_1)\|_q = \left\| \int_0^1 \frac{d}{dt} F(\gamma(t)) dt \right\|_q \leq \int_0^1 \left\| \frac{d}{dt} F(\gamma(t)) \right\|_q dt \leq M \|\mathbf{x}_2 - \mathbf{x}_1\|_q, \quad (7)$$

which proves that  $L_{F,S}^q \leq M$ . Let us show that  $M = \bar{L}_{F,S}^q$ . Fix  $\mathbf{x} \in \mathbb{R}^{p_0}$  and  $\mathbf{J} \in \mathcal{J}_z^C(\mathbf{x})$ . By the definition of operator norm,

$$\begin{aligned} \|\mathbf{C}\mathbf{J}\|_q &= \|(\mathbf{C}\mathbf{J})^T\|_q^* = \max_{\mathbf{v} \in \mathbb{R}^K} \{\|\mathbf{J}^T \mathbf{C}^T \mathbf{v}\|_q^* : \|\mathbf{v}\|_q^* \leq 1\} \\ &= \max_{\mathbf{t} \in \mathbb{R}^{p_0}, \mathbf{v} \in \mathbb{R}^K} \{\mathbf{t}^T \mathbf{J}^T \mathbf{C}^T \mathbf{v} : \|\mathbf{t}\|_q \leq 1, \|\mathbf{v}\|_q^* \leq 1\} \\ &= \max_{\mathbf{t} \in \mathbb{R}^{p_0}, \mathbf{v}, \mathbf{w} \in \mathbb{R}^K} \{\mathbf{t}^T \mathbf{J}^T \mathbf{C}^T \mathbf{v} : \|\mathbf{t}\|_q \leq 1, \mathbf{w}^T \mathbf{v} \leq 1, \|\mathbf{w}\|_q \leq 1\}, \end{aligned} \quad (8)$$

where  $\|\cdot\|_q^*$  denotes the dual norm of  $\|\cdot\|_q$  defined by  $\|\mathbf{v}\|_q^* := \sup_{\mathbf{w} \in \mathbb{R}^K} \{\mathbf{w}^T \mathbf{v} : \|\mathbf{w}\|_q \leq 1\}$  for all  $\mathbf{v} \in \mathbb{R}^K$ , and the first equality is due to the fact that the operator norm of matrix  $\mathbf{C}\mathbf{J}$  induced by norm  $\|\cdot\|_q$  is equal to the operator norm of its transpose  $(\mathbf{C}\mathbf{J})^T$  induced by the dual norm  $\|\cdot\|_q^*$ .

Indeed, by definition of operator norm and dual norm, we have

$$\begin{aligned}
\| \mathbf{CJ} \|_q &= \sup_{\mathbf{x} \in \mathbb{R}^{p_0}} \{ \| \mathbf{CJx} \|_q : \| \mathbf{x} \|_q \leq 1 \} = \sup_{\mathbf{x} \in \mathbb{R}^{p_0}, \mathbf{y} \in \mathbb{R}^p} \{ \mathbf{y}^T \mathbf{CJx} : \| \mathbf{x} \|_q \leq 1, \| \mathbf{y} \|_q^* \leq 1 \} \\
&= \sup_{\mathbf{x} \in \mathbb{R}^{p_0}, \mathbf{y} \in \mathbb{R}^p} \{ \mathbf{x}^T (\mathbf{CJ})^T \mathbf{y} : \| \mathbf{x} \|_q \leq 1, \| \mathbf{y} \|_q^* \leq 1 \} = \sup_{\mathbf{y} \in \mathbb{R}^p} \{ \| (\mathbf{CJ})^T \mathbf{y} \|_q^* : \| \mathbf{y} \|_q^* \leq 1 \} \\
&= \| (\mathbf{CJ})^T \|_q^*.
\end{aligned}$$

The quantity  $\bar{L}_{F,S}^q$  is just the maximization of Equation (8) for all  $\mathbf{x} \in \mathbb{R}^{p_0}$  and all  $\mathbf{J} \in \mathcal{J}_z^C(\mathbf{x})$  and therefore equals  $M$ .  $\square$

The function  $\mathbf{z}$  is semialgebraic, and therefore, there exists a closed zero measure set  $\Omega_z$  such that  $\mathbf{z}$  is continuously differentiable on the complement of  $\Omega_z$ . For any  $\mathbf{x} \notin \Omega_z$ , since  $\mathbf{z}$  is  $C^1$  at  $\mathbf{x}$ , we have  $\mathcal{J}_z^C(\mathbf{x}) = \{ \mathcal{J}_z(\mathbf{x}) \}$  by definition of the Clarke Jacobian. Fix  $\mathbf{x} \notin \Omega_z$  arbitrary. According to the Corollary of Theorem 2.6.6, on page 75 of [10], we have

$$\begin{aligned}
\mathcal{J}_z^C(\mathbf{x}) &\subseteq \text{conv} \{ \mathcal{J}_{\text{ReLU}}^C(\mathbf{Wz}(\mathbf{x}) + \mathbf{Ux} + \mathbf{u}) \cdot \mathcal{J}_{\mathbf{Wz}(\mathbf{x}) + \mathbf{Ux} + \mathbf{u}}^C(\mathbf{x}) \} \\
&= \text{conv} \{ \mathcal{J}_{\text{ReLU}}^C(\mathbf{Wz}(\mathbf{x}) + \mathbf{Ux} + \mathbf{u}) \cdot (\mathbf{W} \cdot \mathcal{J}_z(\mathbf{x}) + \mathbf{U}) \} \\
&= \mathcal{J}_{\text{ReLU}}^C(\mathbf{Wz}(\mathbf{x}) + \mathbf{Ux} + \mathbf{u}) \cdot (\mathbf{W} \cdot \mathcal{J}_z(\mathbf{x}) + \mathbf{U}),
\end{aligned} \tag{9}$$

where the first inclusion is from the cited Corollary, the first equality is because  $\mathbf{z}$  is  $C^1$  at  $\mathbf{x}$  so that the chain rule applies, and the last one is because the Clarke Jacobian is convex.

Fix any  $\bar{\mathbf{x}} \in \mathbb{R}^{p_0}$ , then by definition  $\mathcal{J}_z^C(\bar{\mathbf{x}}) = \text{conv} \{ \lim \mathcal{J}_z(\mathbf{x}_i) : \mathbf{x}_i \rightarrow \bar{\mathbf{x}}, i \rightarrow +\infty, \mathbf{x}_i \notin \Omega_z \}$ . Let  $\{ \mathbf{x}_i \}_{i \in \mathbb{N}}$  be a sequence not in  $\Omega_z$  converging to  $\bar{\mathbf{x}}$ , for each  $\mathbf{x}_i \notin \Omega_z$ , we have by (9) that  $\mathcal{J}_z(\mathbf{x}_i) \in \mathcal{J}_{\text{ReLU}}^C(\mathbf{Wz}(\mathbf{x}_i) + \mathbf{Ux}_i + \mathbf{u}) \cdot (\mathbf{W} \cdot \mathcal{J}_z(\mathbf{x}_i) + \mathbf{U})$ , i.e., there exists  $\mathbf{Y}_i \in \mathcal{J}_{\text{ReLU}}^C(\mathbf{Wz}(\mathbf{x}_i) + \mathbf{Ux}_i + \mathbf{u})$  such that  $\mathcal{J}_z(\mathbf{x}_i) = \mathbf{Y}_i(\mathbf{W} \cdot \mathcal{J}_z(\mathbf{x}_i) + \mathbf{U})$ . By [10, proposition 2.6.2 (b)],  $\mathcal{J}_{\text{ReLU}}^C$  has closed graph. Therefore, by continuity of  $\mathbf{z}$ , up to a subsequence,  $\mathbf{Y}_i \rightarrow \mathbf{Y} \in \mathcal{J}_{\text{ReLU}}^C(\mathbf{Wz}(\bar{\mathbf{x}}) + \mathbf{U}\bar{\mathbf{x}} + \mathbf{u})$  for  $i \rightarrow +\infty$ , which means

$$\mathcal{J}_z^C(\bar{\mathbf{x}}) \subseteq \{ \mathbf{J} : \mathbf{Y} \in \mathcal{J}_{\text{ReLU}}^C(\mathbf{Wz}(\bar{\mathbf{x}}) + \mathbf{U}\bar{\mathbf{x}} + \mathbf{u}), \mathbf{J} = \mathbf{Y}(\mathbf{WJ} + \mathbf{U}) \}, \tag{10}$$

for all  $\bar{\mathbf{x}} \in \mathbb{R}^{p_0}$ . Let  $\mathbf{Y} \in \mathcal{J}_{\text{ReLU}}^C(\mathbf{Wz} + \mathbf{Ux} + \mathbf{u})$ , since we have coordinate-wise applications of ReLU, we have that  $\mathbf{Y} = \text{diag}(\mathbf{s})$  with  $\mathbf{s} \in \partial \text{ReLU}(\mathbf{Wz} + \mathbf{Ux} + \mathbf{u})$ . By equation (10), the right-hand side of equation (6) is upper bounded by

$$\begin{aligned}
&\max_{\mathbf{t}, \mathbf{x} \in \mathbb{R}^{p_0}, \mathbf{s}, \mathbf{z} \in \mathbb{R}^p, \mathbf{v}, \mathbf{w} \in \mathbb{R}^K, \mathbf{J} \in \mathbb{R}^{p \times p_0}} \{ \mathbf{t}^T \mathbf{J}^T \mathbf{C}^T \mathbf{v} : \| \mathbf{t} \|_q \leq 1, \mathbf{w}^T \mathbf{v} \leq 1, \| \mathbf{w} \|_q \leq 1, \mathbf{x} \in \mathcal{S}, \\
&\quad \mathbf{s} \in \partial \text{ReLU}(\mathbf{Wz} + \mathbf{Ux} + \mathbf{u}), \mathbf{z} = \text{ReLU}(\mathbf{Wz} + \mathbf{Ux} + \mathbf{u}), \\
&\quad \mathbf{J} = \text{diag}(\mathbf{s}) \cdot (\mathbf{W} \cdot \mathbf{J} + \mathbf{U}) \}.
\end{aligned} \tag{LipMON-a}$$

Notice that in problem (LipMON-a), we have a matrix variable  $\mathbf{J}$  of size  $p \times p_0$ , i.e., containing  $p \times p_0$  many variables, which is too large for any SDP solvers. To reduce the size, we use the *vector-matrix product* trick introduced in [46] to reduce the size of the unknown variables. From equation  $\mathbf{J} = \text{diag}(\mathbf{s}) \cdot (\mathbf{W} \cdot \mathbf{J} + \mathbf{U})$ , we have  $\mathbf{J} = (\mathbf{I}_p - \text{diag}(\mathbf{s}) \cdot \mathbf{W})^{-1} \cdot \text{diag}(\mathbf{s}) \cdot \mathbf{U}$ . This inversion makes sense because of the strong monotonicity of  $\mathbf{I}_p - \mathbf{W}$  and the fact that all entries of  $\mathbf{s}$  lie in  $[0, 1]$  [46, Proposition 1]. Hence

$$\mathbf{v}^T \mathbf{CJ} = \mathbf{v}^T \mathbf{C} \cdot (\mathbf{I}_p - \text{diag}(\mathbf{s}) \cdot \mathbf{W})^{-1} \cdot \text{diag}(\mathbf{s}) \cdot \mathbf{U} = \mathbf{r}^T \cdot \text{diag}(\mathbf{s}) \cdot \mathbf{U}, \tag{11}$$

where  $\mathbf{r}^T = \mathbf{v}^T \mathbf{C} \cdot (\mathbf{I}_p - \text{diag}(\mathbf{s}) \cdot \mathbf{W})^{-1}$ , which means  $\mathbf{r} - \mathbf{W}^T \cdot \text{diag}(\mathbf{s}) \cdot \mathbf{r} = \mathbf{C}^T \mathbf{v}$ . Set  $\mathbf{y} = \text{diag}(\mathbf{s}) \cdot \mathbf{r}$  and transpose both sides of equation (11), we have  $\mathbf{J}^T \mathbf{C}^T \mathbf{v} = \mathbf{U}^T \mathbf{y}$  with  $\mathbf{r} - \mathbf{W}^T \cdot \mathbf{y} = \mathbf{C}^T \mathbf{v}$ . We can then rewrite the objective function of (LipMON-a) as  $\mathbf{t}^T \mathbf{U}^T \mathbf{y}$ , leading to the following equivalent problem

$$\begin{aligned}
&\max_{\mathbf{t}, \mathbf{x} \in \mathbb{R}^{p_0}, \mathbf{s}, \mathbf{z}, \mathbf{y}, \mathbf{r} \in \mathbb{R}^p, \mathbf{v}, \mathbf{w} \in \mathbb{R}^K} \{ \mathbf{t}^T \mathbf{U}^T \mathbf{y} : \| \mathbf{t} \|_q \leq 1, \mathbf{w}^T \mathbf{v} \leq 1, \| \mathbf{w} \|_q \leq 1, \mathbf{x} \in \mathcal{S}, \\
&\quad \mathbf{s} \in \partial \text{ReLU}(\mathbf{Wz} + \mathbf{Ux} + \mathbf{u}), \mathbf{z} = \text{ReLU}(\mathbf{Wz} + \mathbf{Ux} + \mathbf{u}), \\
&\quad \mathbf{r} - \mathbf{W}^T \mathbf{y} = \mathbf{C}^T \mathbf{v}, \mathbf{y} = \text{diag}(\mathbf{s}) \cdot \mathbf{r} \}.
\end{aligned} \tag{LipMON-b}$$

We have shown that (LipMON-b) is the right hand side of Equation (LipMON) in Lemma 1 and is an upper bound of the right hand side of Equation (6) in Lemma 3, i.e.,  $\bar{L}_{F,S}^q \leq \tilde{L}_{F,S}^q$ .

## A.2 Redundant Constraints of the Lipschitz Model

In order to avoid possible numerical issues of problem (LipMON), and to improve the bounds, we add some redundant constraints to it. For variables  $\mathbf{r}$  and  $\mathbf{y}$ . Note that  $\mathbf{r} = (\mathbf{I}_p - \mathbf{W}^T \cdot \text{diag}(\mathbf{s}))^{-1} \cdot \mathbf{C}^T \mathbf{v}$ , hence  $\|\mathbf{r}\|_2 \leq \|(\mathbf{I}_p - \mathbf{W}^T \cdot \text{diag}(\mathbf{s}))^{-1}\|_2 \cdot \|\mathbf{C}^T\|_2 \cdot \|\mathbf{v}\|_2$ . The operator norm of a matrix induced by  $L_2$  norm is its largest singular value. Hence the operator norm of  $(\mathbf{I}_p - \mathbf{W}^T \cdot \text{diag}(\mathbf{s}))^{-1}$  is the smallest singular value of matrix  $\mathbf{I}_p - \mathbf{W}^T \cdot \text{diag}(\mathbf{s})$ , which is smaller or equal than 1 from the recent work [46]. In summary, we have  $\|\mathbf{r}\|_2 \leq \|\mathbf{C}\|_2 \cdot \|\mathbf{v}\|_2$  and  $\|\mathbf{y}\|_2 \leq \|\mathbf{C}\|_2 \cdot \|\mathbf{v}\|_2$ . For Lipschitz Model w.r.t.  $L_2$  norm, we have  $\|\mathbf{v}\|_2 \leq 1$ ; for Lipschitz Model w.r.t.  $L_\infty$  norm, we have  $\|\mathbf{v}\|_\infty^* = \|\mathbf{v}\|_1 \leq 1$ , thus  $\|\mathbf{v}\|_2 \leq \|\mathbf{v}\|_1 \leq 1$ . Therefore, for both  $L_2$  and  $L_\infty$  norm, we can bound the  $L_2$  norm of variables  $\mathbf{r}$  and  $\mathbf{y}$  by  $\|\mathbf{C}\|_2$ . Moreover, we multiply the equality constraint  $\mathbf{r} - \mathbf{W}^T \cdot \mathbf{y} = \mathbf{C}^T \mathbf{v}$  coordinate-wisely with variables  $\mathbf{s}, \mathbf{z}, \mathbf{y}, \mathbf{r}$  to produce redundant constraints and improve the results. This strengthening technique is already included in the software Gloptipoly3 [20]. With all the discussion above, we now write the strengthened version of problem (LipMON-b) as follows:

$$\begin{aligned}
& \max_{\mathbf{t}, \mathbf{x} \in \mathbb{R}^{p_0}, \mathbf{s}, \mathbf{z}, \mathbf{y}, \mathbf{r} \in \mathbb{R}^p, \mathbf{v}, \mathbf{w} \in \mathbb{R}^K} \{ \mathbf{t}^T \mathbf{U}^T \mathbf{y} : \|\mathbf{t}\|_q \leq 1, \mathbf{w}^T \mathbf{v} \leq 1, \|\mathbf{w}\|_q \leq 1, \mathbf{x} \in \mathcal{S}, \\
& \mathbf{s} \in \partial \text{ReLU}(\mathbf{W}\mathbf{z} + \mathbf{U}\mathbf{x} + \mathbf{u}), \mathbf{z} = \text{ReLU}(\mathbf{W}\mathbf{z} + \mathbf{U}\mathbf{x} + \mathbf{u}), \\
& \mathbf{r} - \mathbf{W}^T \mathbf{y} = \mathbf{C}^T \mathbf{v}, \mathbf{y} = \text{diag}(\mathbf{s}) \cdot \mathbf{r}, \|\mathbf{y}\|_2 \leq \|\mathbf{C}\|_2 \cdot \|\mathbf{v}\|_2, \|\mathbf{r}\|_2 \leq \|\mathbf{C}\|_2 \cdot \|\mathbf{v}\|_2, \\
& \mathbf{s}(\mathbf{r} - \mathbf{W}^T \mathbf{y}) = \mathbf{s}(\mathbf{C}^T \mathbf{v}), \mathbf{z}(\mathbf{r} - \mathbf{W}^T \mathbf{y}) = \mathbf{z}(\mathbf{C}^T \mathbf{v}), \\
& \mathbf{y}(\mathbf{r} - \mathbf{W}^T \mathbf{y}) = \mathbf{y}(\mathbf{C}^T \mathbf{v}), \mathbf{r}(\mathbf{r} - \mathbf{W}^T \mathbf{y}) = \mathbf{r}(\mathbf{C}^T \mathbf{v}) \}. \tag{LipMON-c}
\end{aligned}$$

## A.3 Proof of Lemma 2

The SOS constraint in problem (EllipMON-SOS- $d$ ) can be written as

$$\begin{aligned}
\sigma_0(\mathbf{x}, \mathbf{z}) &= -(\|\mathbf{Q}(\mathbf{C}\mathbf{z} + \mathbf{c}) + \mathbf{b}\|_2^2 - 1) \quad (=: f_1(\mathbf{x}, \mathbf{z})) \\
&+ \sigma_1(\mathbf{x}, \mathbf{z})^T g_q(\mathbf{x} - \mathbf{x}_0) \quad (=: f_2(\mathbf{x}, \mathbf{z})) \\
&+ \tau(\mathbf{x}, \mathbf{z})^T (\mathbf{z}(\mathbf{z} - \mathbf{W}\mathbf{z} - \mathbf{U}\mathbf{x} - \mathbf{u})) \quad (=: f_3(\mathbf{x}, \mathbf{z})) \\
&+ \sigma_2(\mathbf{x}, \mathbf{z})^T (\mathbf{z} - \mathbf{W}\mathbf{z} - \mathbf{U}\mathbf{x} - \mathbf{u}) \quad (=: f_4(\mathbf{x}, \mathbf{z})) \\
&+ \sigma_3(\mathbf{x}, \mathbf{z})^T \mathbf{z} \quad (=: f_5(\mathbf{x}, \mathbf{z})) \\
&= -(f_1(\mathbf{x}, \mathbf{z}) + f_2(\mathbf{x}, \mathbf{z}) + f_3(\mathbf{x}, \mathbf{z}) + f_4(\mathbf{x}, \mathbf{z}) + f_5(\mathbf{x}, \mathbf{z})) =: -f(\mathbf{x}, \mathbf{z}).
\end{aligned}$$

For  $d = 1$ , denote by  $\mathbf{M}_i$  the Gram matrix of polynomial  $f_i(\mathbf{x}, \mathbf{z})$  for  $i = 1, \dots, 5$  and  $\mathbf{M}$  the Gram matrix of polynomial  $f(\mathbf{x}, \mathbf{z})$ , with basis  $[\mathbf{x}^T, \mathbf{z}^T, 1]$ . We have explicitly  $\mathbf{M} = \sum_{i=1}^5 \mathbf{M}_i$ , where  $\mathbf{M}_i$

has the following form

$$\begin{aligned}
\mathbf{M}_1 &= \begin{bmatrix} \mathbf{0}_{p_0 \times p_0} & \mathbf{0}_{p_0 \times p} & \mathbf{0}_{p_0 \times 1} \\ \mathbf{0}_{p \times p_0} & \mathbf{C}^T \mathbf{Q}^2 \mathbf{C} & \mathbf{C}^T \mathbf{Q}^2 \mathbf{c} + \mathbf{C}^T \mathbf{Q} \mathbf{b} \\ \mathbf{0}_{1 \times p_0} & \mathbf{c}^T \mathbf{Q}^2 \mathbf{C} + \mathbf{b}^T \mathbf{Q} \mathbf{C} & \mathbf{c}^T \mathbf{Q}^2 \mathbf{c} + 2\mathbf{b}^T \mathbf{Q} \mathbf{c} + \mathbf{b}^T \mathbf{b} - 1 \end{bmatrix}, \\
\mathbf{M}_2 &= \begin{cases} \begin{bmatrix} -\text{diag}(\sigma_1) & \mathbf{0}_{p_0 \times p} & \text{diag}(\sigma_1) \cdot \mathbf{x}_0 \\ \mathbf{0}_{p \times p_0} & \mathbf{0}_{p \times p} & \mathbf{0}_{p \times 1} \\ \mathbf{x}_0^T \cdot \text{diag}(\sigma_1) & \mathbf{0}_{1 \times p} & \sigma_1^T (\varepsilon^2 - \mathbf{x}_0^2) \end{bmatrix}, & \text{for } L_\infty\text{-norm,} \\ \sigma_1 \begin{bmatrix} -\mathbf{I}_{p_0} & \mathbf{0}_{p_0 \times p} & \mathbf{x}_0 \\ \mathbf{0}_{p \times p_0} & \mathbf{0}_{p \times p} & \mathbf{0}_{p \times 1} \\ \mathbf{x}_0^T & \mathbf{0}_{1 \times p} & \varepsilon^2 - \mathbf{x}_0^T \mathbf{x}_0 \end{bmatrix}, & \text{for } L_2\text{-norm,} \end{cases} \\
\mathbf{M}_3 &= \begin{bmatrix} \mathbf{0}_{p_0 \times p_0} & -\frac{1}{2} \mathbf{U}^T \text{diag}(\tau) & \mathbf{0}_{p_0 \times 1} \\ -\frac{1}{2} \text{diag}(\tau) \mathbf{U} & \text{diag}(\tau) (\mathbf{I}_p - \mathbf{W}) & -\frac{1}{2} \text{diag}(\tau) \cdot \mathbf{u} \\ \mathbf{0}_{1 \times p_0} & -\frac{1}{2} \mathbf{u}^T \cdot \text{diag}(\tau) & 0 \end{bmatrix}, \\
\mathbf{M}_4 &= \begin{bmatrix} \mathbf{0}_{p_0 \times p_0} & \mathbf{0}_{p_0 \times p} & -\frac{1}{2} \mathbf{U}^T \sigma_3 \\ \mathbf{0}_{p \times p_0} & \mathbf{0}_{p \times p} & \frac{1}{2} (\mathbf{I}_p - \mathbf{W}^T) \sigma_3 \\ -\frac{1}{2} \sigma_3^T \mathbf{U} & \frac{1}{2} \sigma_3^T (\mathbf{I}_p - \mathbf{W}) & -\sigma_3^T \mathbf{u} \end{bmatrix}, \\
\mathbf{M}_5 &= \begin{bmatrix} \mathbf{0}_{p_0 \times p_0} & \mathbf{0}_{p_0 \times p} & \mathbf{0}_{p_0 \times 1} \\ \mathbf{0}_{p \times p_0} & \mathbf{0}_{p \times p} & \frac{1}{2} \sigma_2 \\ \mathbf{0}_{1 \times p_0} & \frac{1}{2} \sigma_2^T & 0 \end{bmatrix}.
\end{aligned}$$

Moreover, in order to improve the quality of the ellipsoid, we can also use the *slope restriction* condition of ReLU function as proposed in [22]:  $(z_j - z_i)(\mathbf{W}_{j,:} \mathbf{z} + \mathbf{U}_{j,:} \mathbf{x} + u_j - \mathbf{W}_{i,:} \mathbf{z} - \mathbf{U}_{i,:} \mathbf{x} - u_i) - (z_j - z_i)^2 \geq 0$  for  $i \neq j$ . The Gram matrix of the SOS combination of these constraints with basis  $[\mathbf{x}^T, \mathbf{z}^T, 1]$  has the form

$$\mathbf{M}_6 = \begin{bmatrix} \mathbf{U} & \mathbf{W} & \mathbf{u} \\ \mathbf{0}_{p \times p_0} & \mathbf{I}_p & \mathbf{0}_{p \times 1} \\ \mathbf{0}_{1 \times p_0} & \mathbf{0}_{1 \times p} & 1 \end{bmatrix}^T \begin{bmatrix} \mathbf{0}_{p_0 \times p_0} & \mathbf{T} & \mathbf{0}_{p_0 \times 1} \\ \mathbf{T} & -2\mathbf{T} & \mathbf{0}_{p \times 1} \\ \mathbf{0}_{1 \times p_0} & \mathbf{0}_{1 \times p} & 0 \end{bmatrix} \begin{bmatrix} \mathbf{U} & \mathbf{W} & \mathbf{u} \\ \mathbf{0}_{p \times p_0} & \mathbf{I}_p & \mathbf{0}_{p \times 1} \\ \mathbf{0}_{1 \times p_0} & \mathbf{0}_{1 \times p} & 1 \end{bmatrix},$$

where  $\mathbf{T} = \sum_{i=1}^{p-1} \sum_{j=i+1}^p \lambda_{ij} (\mathbf{e}_i - \mathbf{e}_j)(\mathbf{e}_i - \mathbf{e}_j)^T$  with  $\lambda_{ij} \geq 0$  for all  $i < j$ , and  $\{\mathbf{e}_i\}_{i=1}^p \subseteq \mathbb{R}^p$  is the canonical basis of  $\mathbb{R}^p$ . Since  $\sigma_0(\mathbf{x}, \mathbf{z})$  is an SOS polynomial of degree at most 2, we conclude that  $-\mathbf{M} \succeq 0$ . According to Lemma 5 in [14], the constraint  $-\mathbf{M} \succeq 0$  is equivalent to an SDP constraint using *Schur complements*, which finishes the proof of Lemma 2.

#### A.4 An Adversarial Example

#### A.5 Licenses of Used Assets

Table 4: Summary of the licenses of used assets

| Software | License                            |
|----------|------------------------------------|
| Julia    | MIT License                        |
| JuMP     | Mozilla Public License             |
| Matlab   | Proprietary Software               |
| CVX      | CVX Standard License               |
| Python   | Python Software Foundation License |
| Pytorch  | Berkeley Software Distribution     |
| Mosek    | Proprietary Software               |
| Our code | CeCILL Free Software License       |

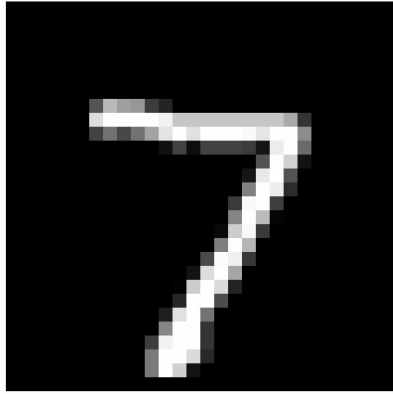

(a) Original example, classified as 7

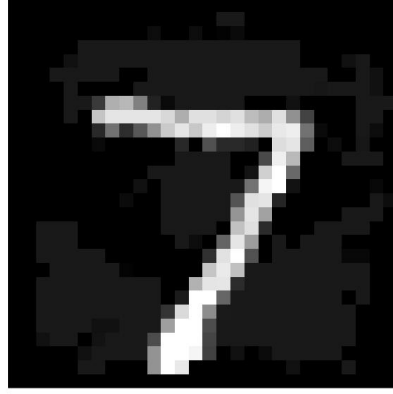

(b) Adversarial example, classified as 3

Figure 2: An adversarial example of the first test MNIST input found by PGD algorithm for  $L_\infty$  norm with  $\varepsilon = 0.1$ .
